# Supplementary material
Source: Springer Nature journal article supplement (https://www.springermedizin.de/resource/supplementary/13041_2009_30_MOESM2_ESM.pdf/25657446)

**A**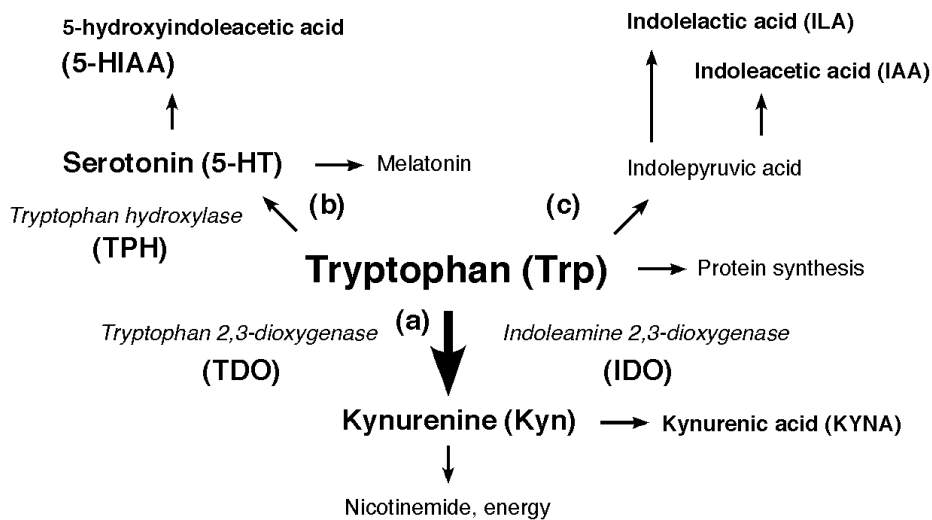**B****Wild-type allele**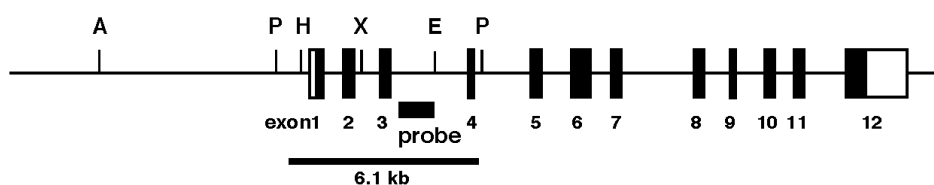**Targeting vector**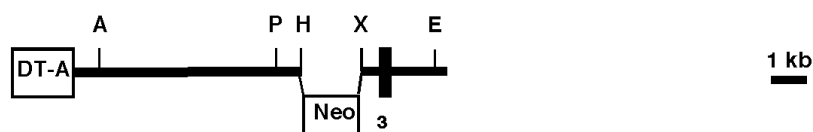**Targeted allele**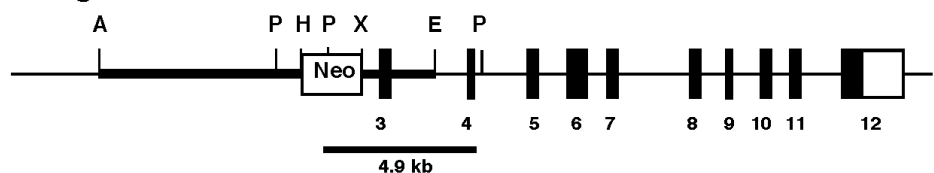**C**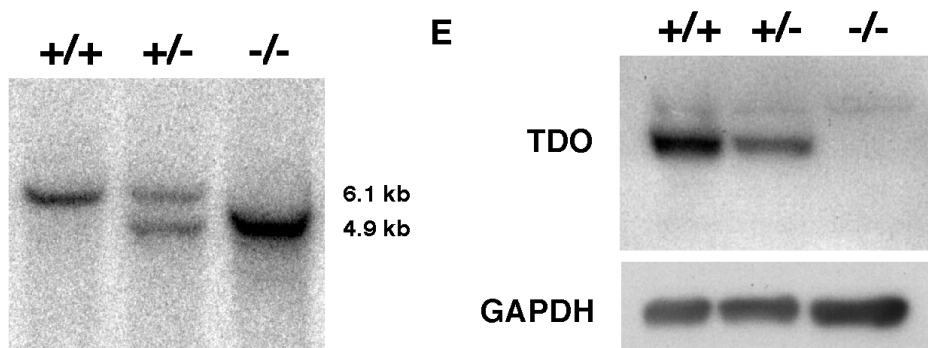**D**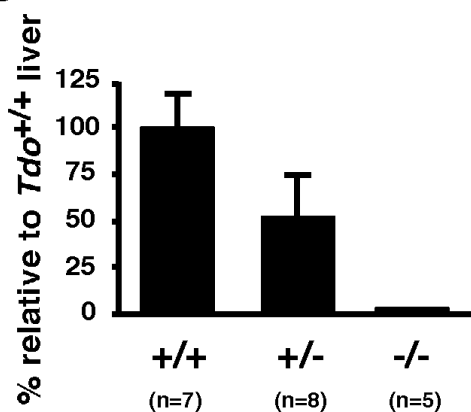**F**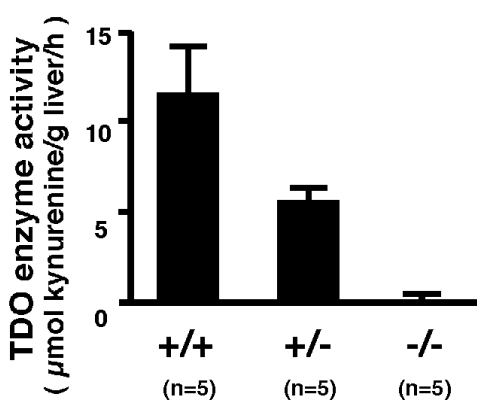

Supplement: MOESM2 [file 25657446]
